# Supplementary material for: Intensive Chemotherapy with or without Midostaurin in Adults ≥60 years old with FLT3-Mutated AML: A FILO-DATAML-PETHEMA Real-World Study
Source: Research Square preprint supplement (doi:10.21203/rs.3.rs-7123525/v1), 2025-08-22
Supplement: Supplementary file 1 [file 44ffb16aaec62cd1edd2b9e0.docx]

**Table 1. Baseline characteristics at AML diagnosis**

|  | **ICT**  **n = 371 (65.7%)** | **ICT+MIDO**  **n = 194 (34.3%)** | **Total**  **n = 565 (100%)** | **P value** |
| --- | --- | --- | --- | --- |
| **Age (years) at diagnosis**  Median (IQR)  Range | 67.3 (63.6-72.5)  60.0-81.4 | 67.6 (63.8-70.9)  60.2-77.7 | 67.5 (63.7-71.8)  60.0-81.4 | 0.248 |
| **Gender: n (%)**  Male  Female | 198 (53.4)  173 (46.6) | 97 (50.0)  97 (50.0) | 295 (52.2)  270 (47.8) | 0.446 |
| **ECOG at diagnosis: n (%)**  0-1  ≥ 2 | 249 (72.8)  93 (27.2) | 162 (86.6)  25 (13.4) | 411 (77.7)  118 (22.3) | <0.001 |
| **WBC at diagnosis (× 109/L)**  Median (IQR)  Range | 54.9 (18.2-133.2)  0.3-483.6 | 25.4 (6.3-96.6)  0.5-890.0 | 37.0 (12.8-101)  0.95-348.6 | <0.001 |
| **BM blast at diagnosis (%)**  Median (IQR)  Range | 77.0 (51.0-89.0)  0.0-100 | 76.0 (54.0-88.0)  3.0-99.0 | 77.0 (52.0-88.0)  0.0-100 | 0.696 |
| **AML status: n (%)**  *De novo*  Secondary AML a | 299 (80.8)  71 (19.2) | 156 (81.2)  36 (18.8) | 455 (81.0)  107 (19.0) | 0.899 |
| **Cytogenetics risk: n (%)** b  Favorable  Intermediate  Adverse | 4 (1.1)  330 (92.7)  22 (6.2) | 3 (1.5)  182 (93.8)  9 (4.6) | 7 (1.3)  512 (93.1)  31 (5.6) | 0.715 |
| ***FLT3*-ITDmutation:n (%) c** | 329 (88.7) | 154 (79.4) | 483 (85.5) | 0.002 |
| ***FLT3*-TKDmutation:n (%) c** | 51 (19.5) | 47 (24.2) | 98 (21.5) | 0.229 |
| ***FLT3* AR ITD/wt: n (%)**  ≤50%  > 50% | 123 (45.2)  149 (54.8) | 67 (45.0)  82 (55.0) | 190 (45.1)  231 (54.9) | 0.960 |
| ***NPM1* mutation:n (%)** | 214 (58.8) | 127 (66.5) | 341 (61.4) | 0.076 |

MIDO, midostaurin; ECOG, performance status; WBC, white blood cells; AML, acute myeloid leukemia; ITD, internal tandem duplication; TKD, tyrosine kinase domain; IQR, interquartile range; AR, allelic ratio.

a non-*de novo* AML (35 post MDS, 7 post MPN, 48 post CMML, 10 therapy-related and 7 others)

b according to MRC 2010 classification

c one patient can be included in both subgroups -ITD and TKD mutations (16 displayed both mutations)
