# Supplementary material for: Intensive Chemotherapy with or without Midostaurin in Adults ≥60 years old with FLT3-Mutated AML: A FILO-DATAML-PETHEMA Real-World Study
Source: Research Square preprint supplement (doi:10.21203/rs.3.rs-7123525/v1), 2025-08-22
Supplement: Supplementary file 2 [file 4b5e7928a851d0edfb6a9c57.docx]

**Table 4. Cox model for factors independently associated with OS**

|  | **n** | **Events** | **aHR** | **95% CI** | **P value** |
| --- | --- | --- | --- | --- | --- |
| **Midostaurin**  No  Yes | 371  194 | 318  95 | 1  0.46 | -  0.36-0.58 | -  <0.001 |
| **AML status**  *De novo*  Secondary AML a | 455  107 | 325  86 | 1  1.37 | -  1.08-1.75 | -  0.010 |
| **ECOG at diagnosis**  0–1  ≥ 2 | 411  118 | 282  100 | 1  1.36 | -  1.07-1.72 | -  0.010 |
| **WBC at diagnosis**  <30.109/L  ≥30.109/L | 232  331 | 151  260 | 1  1.27 | -  1.03-1.56 | -  0.028 |
| ***FLT3* AR ITD/wt**  ≤50%  > 50% | 190  231 | 130  180 | 1  1.45 | -  1.15-1.83 | -  0.002 |

aHR, adjusted hazard ratio; CI, confidence interval; AML, acute myeloid leukemia; ECOG, performance status; AR, allelic ratio.

a non-*de novo* AML
