# Supplementary material for: Intensive Chemotherapy with or without Midostaurin in Adults ≥60 years old with FLT3-Mutated AML: A FILO-DATAML-PETHEMA Real-World Study
Source: Research Square preprint supplement (doi:10.21203/rs.3.rs-7123525/v1), 2025-08-22
Supplement: Supplementary file 6 [file b4624a2e9ad3df2c55444571.docx]

**Table 2. Response to induction chemotherapy**

|  | **Without MIDO**  **n = 371 (65.7%)** | **With MIDO**  **n = 194 (34.3%)** | **Total**  **n = 565 (100%)** | **P value** |
| --- | --- | --- | --- | --- |
| **Combined criteria for best response: n (%)**  CR  CRi  CRc a  PR  ORR b  MLFS  Failure c  No evaluation | 204 (55.0)  30 (8.1)  234 (63.1)  13 (3.5)  247 (66.6)  0 (0.0)  54 (14.6)  70 (18.9) | 138 (71.1)  15 (7.7)  153 (78.9)  4 (2.1)  157 (80.9)  2 (1.0)  26 (13.4)  9 (4.6) | 342 (60.5)  45 (8.0)  387 (68.5)  17 (3.0)  404 (71.5)  2 (0.4)  80 (14.2)  79 (14.0) | <0.001 |

MIDO, midostaurin; CR, complete remission; CRi, complete remission with incomplete hematologic recovery; PR, partial remission; MLFS, morphological leukemia-free state; ORR, overall response rate; IQR, interquartile range.

a Composite complete remission (CRc) = CR + CRi

b Overall response rate (ORR) = CRc + PR

c Failure = progression + stable disease
