# Supplementary material for: Intensive Chemotherapy with or without Midostaurin in Adults ≥60 years old with FLT3-Mutated AML: A FILO-DATAML-PETHEMA Real-World Study
Source: Research Square preprint supplement (doi:10.21203/rs.3.rs-7123525/v1), 2025-08-22
Supplement: Supplementary file 7 [file df5972fa174f11ffe9ff027d.docx]

**Table 3.** **Logistic regression model for factors independently associated with CR/CRi**

|  | **n** | **Events** | **aOR** | **95% CI** | **P value** |
| --- | --- | --- | --- | --- | --- |
| **Midostaurin**  No  Yes | 371  194 | 234  153 | 1  1.97 | -  1.29-2.98 | -  0.002 |
| **ECOG at diagnosis**  0–1  ≥ 2 | 411  118 | 297  69 | 1  0.64 | -  0.41-0.99 | -  0.047 |
| **Age at diagnosis**  < 70 years  ≥ 70 years | 364  201 | 265  122 | 1  0.61 | -  0.42-0.89 | -  0.010 |
| **Cytogenetics risk**  Fav/Intermediate  Adverse | 519  31 | 362  15 | 1  0.39 | -  0.19-0.83 | -  0.015 |

aOR, adjusted odds ratio; CI, confidence interval; ECOG, performance status; CR, complete remission ; CRi, complete remission with incomplete hematologic recovery.
